# Supplementary material for: Novel scalable aerosol-assisted CVD route for perovskite solar cells
Source: Royal Society of Chemistry journal article supplement (doi:10.1039/d0ma00906g), 2021-01-01
Supplement: d0ma00906g1.pdf [file d0ma00906g1.pdf]

## Novel scalable aerosol-assisted CVD route for perovskite solar cells

S. R. Ratnasingham<sup>1,2</sup>, L. Mohan<sup>1,2</sup>, M. Daboczi<sup>3</sup>, T. Degoussé<sup>2</sup>, R. Binion<sup>†,2</sup>, O. Fenwick<sup>2</sup>, J.-S. Kim<sup>3</sup>, M. A. McLachlan<sup>1</sup> and J. Briscoe<sup>2\*</sup>

1. Department of Materials and Centre for Processable Electronics, Imperial College London, W12 0BZ, UK

2. School of Engineering and Materials Science and Materials Research Institute, Queen Mary University of London, E1 4NS, UK. [j.briscoe@qmul.ac.uk](mailto:j.briscoe@qmul.ac.uk)

3. Department of Physics and Centre for Processable Electronics, Imperial College London, SW7 2AZ, UK

[\\*j.briscoe@qmul.ac.uk](mailto:j.briscoe@qmul.ac.uk)

### Supplementary Information

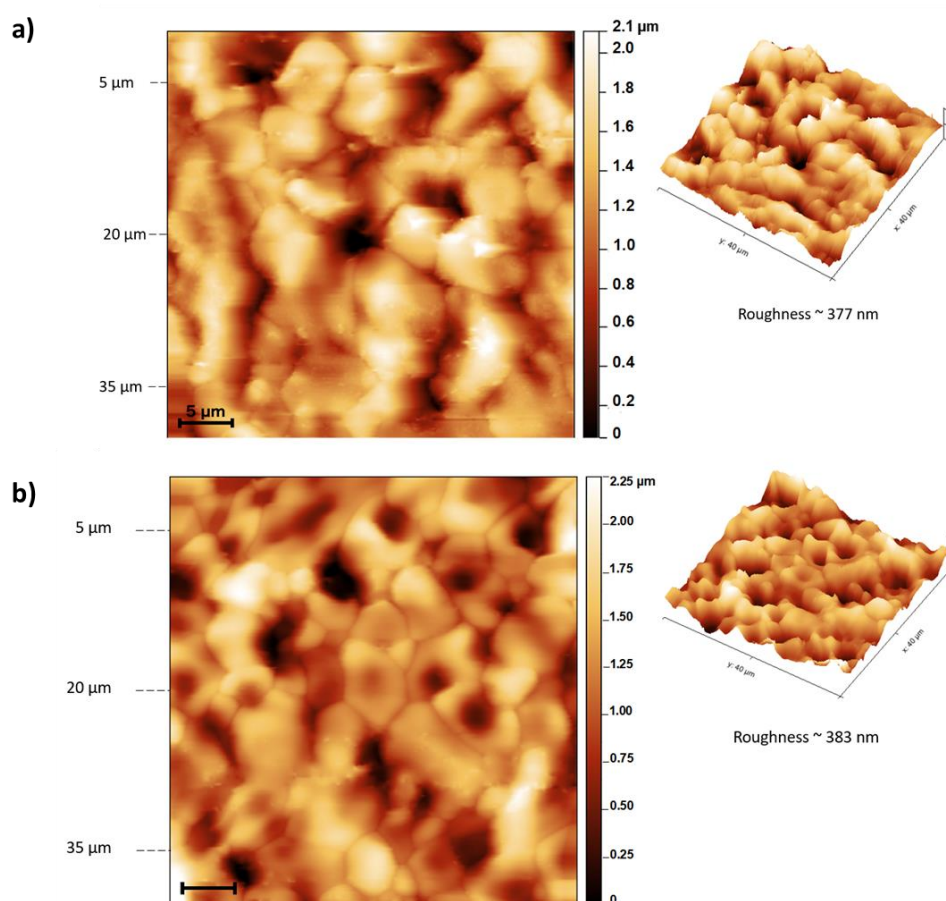

**Figure S1.** Atomic force microscopy images of two AACVD MAPI films. Measurements, show a film R.M.S. roughness of 377 nm for sample a) and 383 nm for sample b).

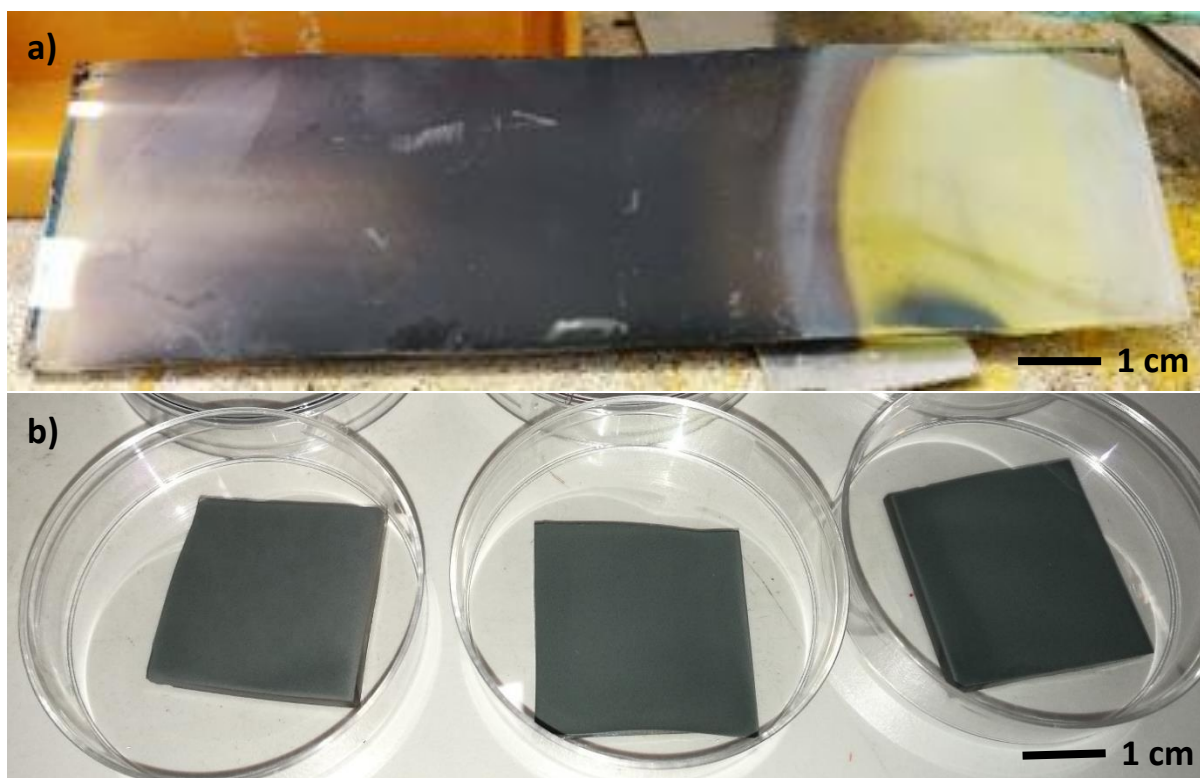

**Figure S2.** Photographs of MAPI films deposited via AACVD. a) Shows a 14 cm x 7 cm substrate (maximum size) coated with MAPI via our AACVD method. b) Three 2.5 cm x 2.5 cm substrates coated with MAPI, using our AACVD method.

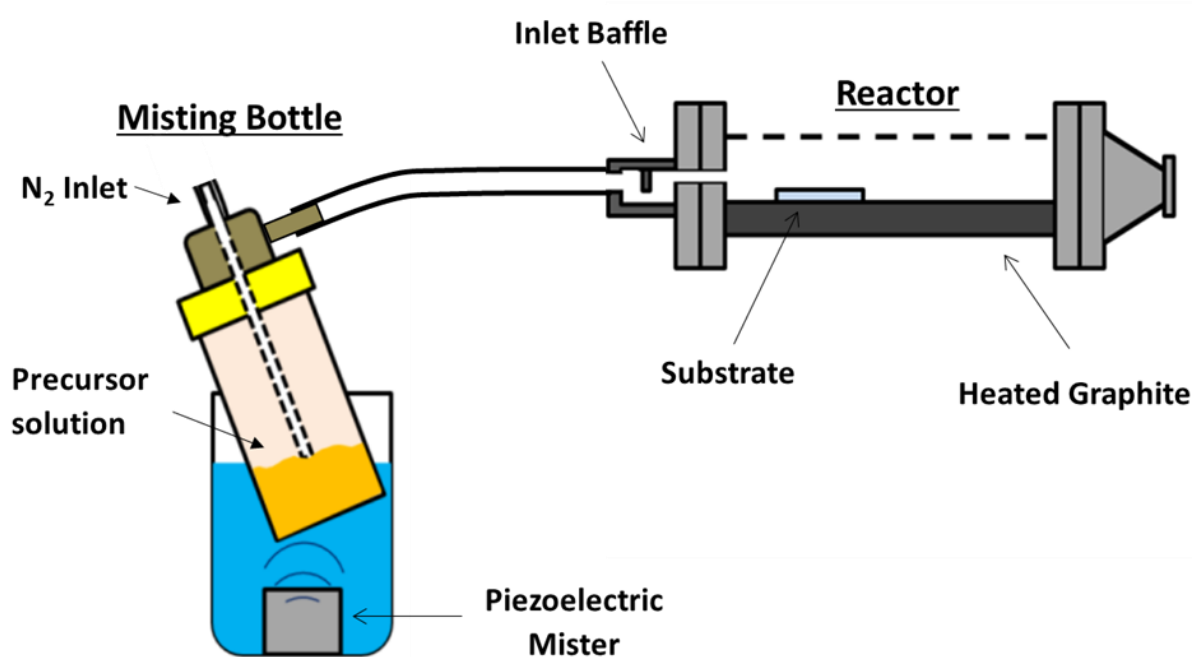

**Figure S3.** Schematic of the experimental setup for AACVD of perovskite films.

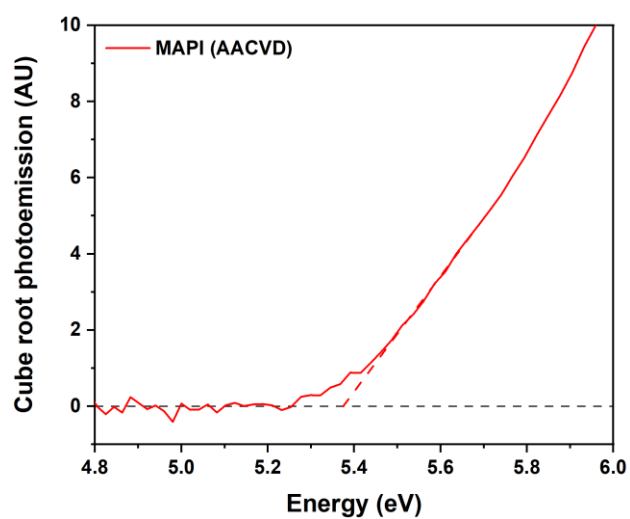

**Figure S4.** APS data with intercept showing a valence band position of 5.37 eV for the final MAPI film.

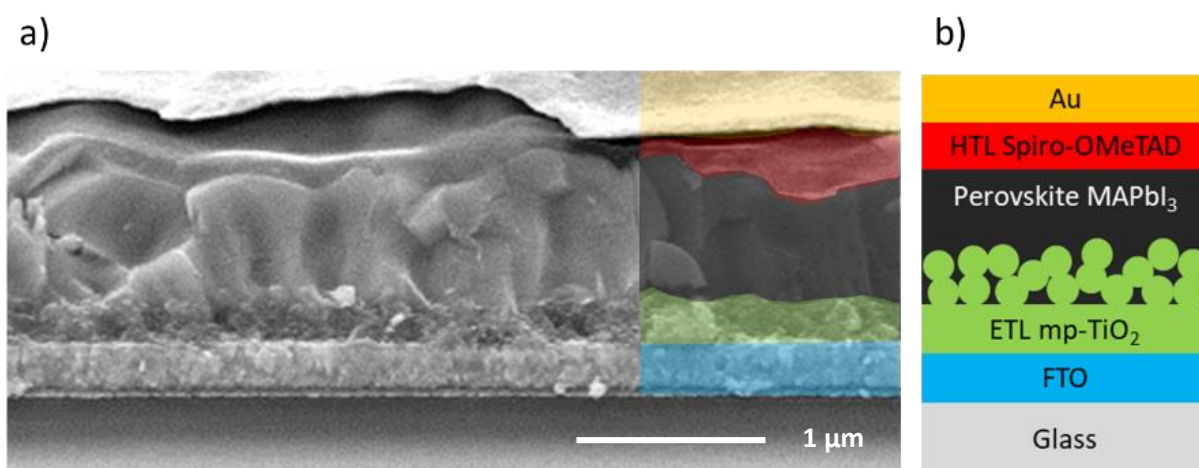

**Figure S5.** SEM cross-section of completed cell using spiro-OMeTAD (a) with corresponding schematic (b) showing n-i-p configuration used. Same comment as main paper regarding lower layers.

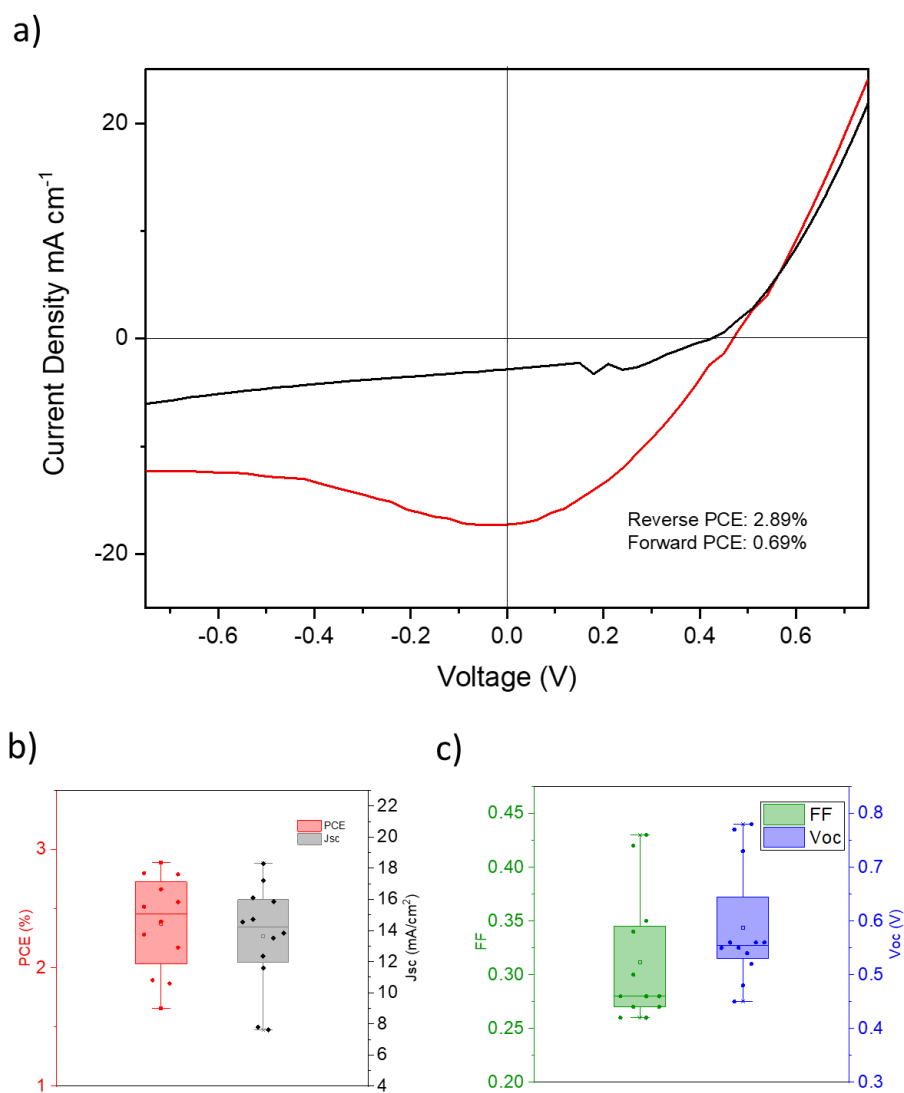

**Figure S6.** Performance of devices using spiro-OMeTAD HTLs, as shown in Figure S5. a) J-V Scan of champion cell (measured at 0.03 V/s). b-c) Box-plot of PCE and  $J_{sc}$  (b) and FF and  $V_{oc}$  (c) of 12 cells.
